# Supplementary material
Source: MDPI journal article supplement (https://www.mdpi.com/2071-1050/12/12/4917)
Supplement: s1 [file s1]

- **Supplementary Materials**

**Table S1.** Description of variables used for analysis.

| **variable name** | | **type** | **description of the question** | **transformation** |
| --- | --- | --- | --- | --- |
| approach to environment (env_approach) | knowledge | ordinal | Are the following terms known to you?: sustainable agriculture, integrated agriculture, organic agriculture, codex alimentarius | sum of binary variables with range 0–4 |
| actions | ordinal | Have any of following actions 1 to improve the environment been undertaken during the last 3 years? | sum of binary variables with range 0–8 |
| self_assess | ordinal | How do you assess your awareness of ecology and sustainable development? | Likert scale 1–5, multiplied by 2 due to covariance matrix scaling |
| plans | binary | Do you intend to install an alternative energy source? | 0-1 scale, multiplied by 3 due to covariance matrix scaling |
| wealth | assets | continuous | overall value of farm’s assets | logarithm of value, due to not normal distribution |
| income | continuous | income per hour of unpaid work | logarithm of value, due to not normal distribution |
| i_a | continuous | interaction of income and assets | assets times income |
| specialization | animal | binary | farm type: milk, other: grazing livestock or granivores | |
| mixed | binary | farm type mixed | |
| farm size | es | ordinal | economic size class (standard output in thousand euro): 1 – 2–8; 2 – 8–25; 3 – 25–50; 4 – 50–100; 5 – 100–500; 6 – >500 | |
| production | continuous | value of overall production | logarithm of value, due to not normal distribution |
| ag_prod | continuous | value of agricultural production | logarithm of value, due to not normal distribution |
| uaa | continuous | size of utilized agricultural area | logarithm of value, due to not normal distribution |
| lsu | continuous | number of livestock units | logarithm of value, due to not normal distribution |
| land ownership | lease_p | continuous | share of leased land | |
| lease_b | binary | Do you lease any land? | |
| pressure generated by production | stock_dens | continuous | stocking density – number of livestock units per ha of utilized agricultural area | logarithm of value, due to not normal distribution cleared from farms without animals (21) |
| fert_rate_A, | continuous | fertilization intensity – cost of fertilizers per ha of utilized agricultural area | |
| fert_rate_B | continuous | fertilization intensity – amount of fertilizers (in kg) per ha of utilized agricultural area | cleared from outliers (4) |
| fert_plan | binary | Does the farm have a fertilization plan? | |
| subsidies | subs_A | continuous | sum of direct payments, LFA subsidies, payments for agri-environmental schemes and greening payments per value of overall production | logarithm of value, due to not normal distribution |
| subs_B | continuous | sum of direct payments, LFA subsidies, payments for agri-environmental schemes and greening payments per ha of utilized agricultural area | cleared from outliers (1) |
| subs_G | continuous | value of greening payment per ha of utilized agricultural area | |
| education and experience | edu | ordinal | Farmer’s education level: 1 – basic; 2 – vocational; 3 – secondary; 4 – higher vocational (bachelor); 5 – higher (master); 6 – scientific (phd) | |
| ag_edu | binary | Does the farmer have agricultural education? | |
| edu_B | binary | Does the farmer have at least secondary, agricultural education? | |
| exper | continuous | For how many years has the farmer been running the farm? | |
| professionalization | prof_A | continuous | The share of agricultural income in the total farmer’s household income | |
| prof_B | binary | Does the household have any sources of income outside of agriculture? | |
| no_contract | binary | Sale of products without previously signed contracts | |

1-Reduction in plant protection products, reduction in fertilizer consumption, reduction in stocking density, afforestation, set-aside, catch crops, arable land cover during winter, reduction in the share of cereals in the sowing structure, increase in the share of permanent grassland, thermal insulation of buildings, traditional cesspools replaced with ecological ones, improvement of the heating stove, modernization of the storage place for plant protection products and fertilizers, straw covering, other

Source: own study based on the questionnaire survey.

**Table S2.** Polychoric correlations and descriptive statistics of the data used in the study, N=120.

| **knowledge** | **actions** | **self_assess** | **plans** | **assets** | **income** | **i_a** | **animal** | **mixed** | **es** | **production** | **ag_prod** | **uaa** | **Lsu** | **lease_p** | **lease_b** | **stock_dens** | **fert_rate_A** | **fert_rate_B** | **fert_plan** | **subs_A** | **subs_B** | **subs_G** | **edu** | **ag_edu** | **edu_B** | **exper** | **prof_A** | **prof_B** | **no_contract** |
| --- | --- | --- | --- | --- | --- | --- | --- | --- | --- | --- | --- | --- | --- | --- | --- | --- | --- | --- | --- | --- | --- | --- | --- | --- | --- | --- | --- | --- | --- |
| polychoric correlations | | | | | | | | | | | | | | | | | | | | | | | | | | | | | |
| 1 |  |  |  |  |  |  |  |  |  |  |  |  |  |  |  |  |  |  |  |  |  |  |  |  |  |  |  |  |  |
| 0.24 | 1 |  |  |  |  |  |  |  |  |  |  |  |  |  |  |  |  |  |  |  |  |  |  |  |  |  |  |  |  |
| 0.6 | 0.23 | 1 |  |  |  |  |  |  |  |  |  |  |  |  |  |  |  |  |  |  |  |  |  |  |  |  |  |  |  |
| 0.21 | 0.3 | 0.27 | 1 |  |  |  |  |  |  |  |  |  |  |  |  |  |  |  |  |  |  |  |  |  |  |  |  |  |  |
| 0.36 | 0.21 | 0.19 | 0.22 | 1 |  |  |  |  |  |  |  |  |  |  |  |  |  |  |  |  |  |  |  |  |  |  |  |  |  |
| 0.44 | 0.24 | 0.34 | 0.35 | 0.47 | 1 |  |  |  |  |  |  |  |  |  |  |  |  |  |  |  |  |  |  |  |  |  |  |  |  |
| 0.45 | 0.26 | 0.33 | 0.34 | 0.69 | 0.96 | 1 |  |  |  |  |  |  |  |  |  |  |  |  |  |  |  |  |  |  |  |  |  |  |  |
| 0.11 | –0.07 | 0.1 | 0.02 | 0.11 | –0.06 | –0.01 | 1 |  |  |  |  |  |  |  |  |  |  |  |  |  |  |  |  |  |  |  |  |  |  |
| –0.06 | –0.05 | 0 | –0.07 | –0.02 | 0.07 | 0.04 | x | 1 |  |  |  |  |  |  |  |  |  |  |  |  |  |  |  |  |  |  |  |  |  |
| 0.28 | 0.22 | 0.06 | 0.03 | 0.8 | 0.58 | 0.71 | –0.02 | 0.01 | 1 |  |  |  |  |  |  |  |  |  |  |  |  |  |  |  |  |  |  |  |  |
| 0.34 | 0.23 | 0.2 | 0.26 | 0.74 | 0.65 | 0.76 | 0.01 | 0.01 | 0.92 | 1 |  |  |  |  |  |  |  |  |  |  |  |  |  |  |  |  |  |  |  |
| 0.38 | 0.23 | 0.19 | 0.28 | 0.75 | 0.67 | 0.78 | –0.07 | 0.06 | 0.95 | 0.96 | 1 |  |  |  |  |  |  |  |  |  |  |  |  |  |  |  |  |  |  |
| 0.32 | 0.26 | 0.16 | 0.04 | 0.77 | 0.55 | 0.69 | –0.01 | 0.01 | 0.83 | 0.7 | 0.7 | 1 |  |  |  |  |  |  |  |  |  |  |  |  |  |  |  |  |  |
| 0.17 | 0.14 | 0.12 | 0.28 | 0.65 | 0.46 | 0.57 | –0.04 | –0.08 | 0.85 | 0.83 | 0.85 | 0.56 | 1 |  |  |  |  |  |  |  |  |  |  |  |  |  |  |  |  |
| –0.04 | 0.07 | 0.03 | –0.11 | –0.03 | 0.21 | 0.15 | –0.11 | –0.03 | 0.43 | 0.27 | 0.29 | 0.39 | 0.29 | 1 |  |  |  |  |  |  |  |  |  |  |  |  |  |  |  |
| 0 | 0.15 | 0 | 0.07 | 0.05 | 0.12 | 0.1 | –0.15 | 0.06 | 0.43 | 0.3 | 0.33 | 0.28 | 0.32 | 0.93 | 1 |  |  |  |  |  |  |  |  |  |  |  |  |  |  |
| –0.06 | –0.05 | 0 | 0.33 | 0.11 | 0.06 | 0.08 | –0.04 | –0.1 | 0.31 | 0.38 | 0.4 | 0–.2 | 0.7 | 0.01 | 0.13 | 1 |  |  |  |  |  |  |  |  |  |  |  |  |  |
| 0.3 | –0.01 | 0.04 | 0.06 | 0.29 | 0.25 | 0.3 | 0.05 | –0.04 | 0.39 | 0.35 | 0.37 | 0.25 | 0.2 | 0.05 | 0.04 | 0.03 | 1 |  |  |  |  |  |  |  |  |  |  |  |  |
| 0.29 | –0.06 | –0.04 | –0.04 | 0.22 | 0.17 | 0.2 | –0.06 | 0.14 | 0.41 | 0.36 | 0.38 | 0.19 | 0.24 | 0.1 | 0.11 | 0.11 | 0.7 | 1 |  |  |  |  |  |  |  |  |  |  |  |
| 0.32 | 0.1 | 0.06 | 0.03 | 0.33 | 0.16 | 0.24 | –0.05 | –0.07 | 0.27 | 0.17 | 0.23 | 0.31 | 0.21 | 0.04 | 0.2 | –0.02 | 0.03 | –0.19 | 1 |  |  |  |  |  |  |  |  |  |  |
| –0.1 | –0.01 | –0.09 | –0.14 | –0.21 | –0.35 | –0.34 | 0 | –0.03 | –0.58 | –0.67 | –0.62 | –0.09 | –0.56 | –0.24 | –0.31 | –0.58 | –0.29 | –0.37 | 0.2 | 1 |  |  |  |  |  |  |  |  |  |
| 0.03 | 0.12 | 0 | 0.21 | –0.02 | –0.13 | –0.01 | 0.06 | –0.18 | –0.27 | –0.21 | –0.21 | –0.18 | –0.13 | –0.32 | –0.4 | 0 | –0.14 | –0.21 | 0.15 | 0.57 | 1 |  |  |  |  |  |  |  |  |
| 0.12 | 0.1 | –0.04 | 0.22 | 0.02 | –0.13 | –0.01 | –0.04 | –0.16 | 0–.2 | –0.14 | –0.14 | –0.11 | –0.09 | –0.34 | –0.45 | –0.01 | –0.14 | –0.11 | 0.13 | 0.47 | 0.78 | 1 |  |  |  |  |  |  |  |
| 0.27 | 0.01 | 0.31 | –0.17 | 0.12 | 0.07 | 0.09 | 0.05 | 0.03 | 0.02 | 0.03 | 0.01 | 0.1 | –0.15 | –0.13 | –0.23 | –0.26 | 0.19 | 0.07 | 0.03 | 0.08 | 0.09 | 0.06 | 1 |  |  |  |  |  |  |
| 0.31 | 0.08 | 0.1 | –0.12 | 0.46 | 0.45 | 0.52 | 0.05 | –0.25 | 0.49 | 0.48 | 0.48 | 0.33 | 0.28 | –0.01 | –0.03 | 0.08 | 0.32 | 0.24 | 0.01 | –0.41 | –0.09 | 0.14 | 0.5 | 1 |  |  |  |  |  |
| 0.45 | 0.06 | 0.4 | –0.19 | 0.27 | 0.23 | 0.27 | 0.02 | –0.05 | 0.26 | 0.22 | 0.2 | 0.27 | 0.03 | 0.03 | 0.05 | –0.19 | 0.23 | 0.13 | 0.11 | –0.07 | 0 | –0.01 | 0.9 | x | 1 |  |  |  |  |
| 0.09 | 0.21 | 0.04 | 0.11 | 0.02 | 0.1 | 0.09 | –0.13 | 0.12 | 0.09 | 0.09 | 0.11 | 0.02 | 0.07 | 0.06 | 0.03 | 0.06 | –0.1 | 0.06 | –0.18 | –0.12 | –0.07 | –0.01 | –0.42 | –0.27 | –0.47 | 1 |  |  |  |
| 0.12 | 0.12 | 0 | 0.18 | 0.44 | 0.35 | 0.41 | –0.09 | 0.12 | 0.51 | 0.46 | 0.46 | 0.45 | 0.44 | 0.12 | –0.04 | 0.13 | 0.02 | 0.11 | 0.24 | –0.2 | –0.03 | 0.07 | –0.18 | 0.29 | 0.03 | 0.14 | 1 |  |  |
| –0.03 | –0.04 | 0.2 | –0.01 | –0.31 | –0.09 | –0.16 | 0.18 | –0.04 | –0.2 | –0.19 | –0.14 | –0.41 | –0.18 | 0.01 | –0.03 | 0.11 | 0.2 | 0.11 | –0.27 | –0.25 | –0.27 | –0.44 | 0.25 | 0.13 | 0.09 | –0.01 | –0.93 | 1 |  |
| –0.28 | 0.06 | –0.27 | –0.35 | –0.39 | –0.38 | –0.42 | –0.01 | 0.11 | –0.27 | –0.37 | –0.41 | –0.2 | –0.33 | –0.12 | –0.19 | –0.22 | –0.04 | –0.3 | –0.15 | 0.2 | –0.02 | 0.03 | –0.01 | –0.15 | –0.05 | 0.05 | 0.06 | –0.1 | 1 |
| std. dev and means | | | | | | | | | | | | | | | | | | | | | | | | | | | | | |
| 1.2 | 1.8 | 1.4 | 1.4 | 0.69 | 0.76 | 6.7 | 0.49 | 0.49 | 1.1 | 0.94 | 0.95 | 0.68 | 0.92 | 0.24 | 0.5 | 0.75 | 0.32 | 0.22 | 0.5 | 0.85 | 230 | 0.79 | 0.96 | 0.41 | 0.5 | 11 | 27 | 0.48 | 0.46 |
| 2.3 | 2.6 | 6.3 | 0.83 | 7.0 | 3.2 | 22 | 0.38 | 0.39 | 3.4 | 5.1 | 5.1 | 3.1 | 3.4 | 0.19 | 0.57 | 0.2 | 0.57 | 0.45 | 0.58 | –2.2 | 834 | 2.9 | 2.9 | 0.79 | 0.56 | 2.5 | 76 | 0.64 | 0.71 |

**Table S3:** Control variable selection for model with income and assets (estimates involving control variables, one best suited to each group of factors, were used for models 6–12 in Table 3)

| **variables\model** | **6–12/1** | **6–12/2** | **6–12/3** | **6–12/4** | **6–12/5** | **6–12/6** | **6–12/7** |
| --- | --- | --- | --- | --- | --- | --- | --- |
| knowledge | 1  (constr.) | 1  (constr.) | 1  (constr.) | 1  (constr.) | 1  (constr.) | **1**  **(constr.)** | 1  (constr.) |
| actions | 0.323* | 0.293* | 0.319* | 0.265 | 0.301* | **0.263*** | 0.302* |
| (0.167) | (0.157) | (0.185) | (0.163) | (0.170) | **(0.146)** | (0.165) |
| self_assess | 0.667** | 0.653** | 0.656* | 0.539* | 0.607* | **0.597*** | 0.658* |
| (0.329) | (0.329) | (0.341) | (0.303) | (0.319) | **(0.331)** | (0.352) |
| plans | 0.486* | 0.516 | 0.497 | 0.423 | 0.463 | **0.386** | 0.495 |
| (0.283) | (0.317) | (0.320) | (0.301) | (0.284) | **(0.242)** | (0.316) |
| assets | 3.793* | 4.576** | 3.672* | 4.071 | 4.197* | **3.759*** | 3.854* |
| (1.997) | (2.286) | (2.194) | (2.495) | (2.346) | **(2.247)** | (2.258) |
| income | 8.410** | 9.024* | 8.087* | 9.177* | 9.352* | **8.459*** | 8.549* |
| (4.215) | (4.623) | (4.632) | (5.299) | (4.958) | **(4.692)** | (4.741) |
| i_a | –1.035* | –1.102* | –0.994 | –1.141 | –1.144* | **–1.041** | –1.060* |
| (0.570) | (0.624) | (0.624) | (0.719) | (0.666) | **(0.638)** | (0.643) |
| mixed | –0.655 |  |  |  |  |  |  |
| (0.431) |  |  |  |  |  |  |
| es |  | –0.558 |  |  |  |  |  |
|  | (0.358) |  |  |  |  |  |
| lease_b |  |  | 0.226 |  |  |  |  |
|  |  | (0.443) |  |  |  |  |
| fert_rate_A |  |  |  | 1.615 |  |  |  |
|  |  |  | (1.023) |  |  |  |
| subs_A |  |  |  |  | 0.396 |  |  |
|  |  |  |  | (0.300) |  |  |
| edu_B |  |  |  |  |  | **1.073*** |  |
|  |  |  |  |  | **(0.609)** |  |
| no_contract |  |  |  |  |  |  | –0.289 |
|  |  |  |  |  |  | (0.465) |
| e.env_ approach | 2.676 | 2.614 | 2.758 | 3.334 | 2.945 | **3.217** | 2.815 |
| (1.830) | (1.982) | (2.074) | (2.822) | (2.165) | **(2.345)** | (2.081) |
| log.like | –558.909 | –558.256 | –559.947 | –557.811 | –559.072 | **–557.535** | –559.907 |
| df | 25 | 25 | 25 | 25 | 25 | **25** | 25 |
| AIC | 1167.817 | 1166.512 | 1169.894 | 1165.622 | 1168.144 | **1165.070** | 1169.815 |
| BIC | 1237.505 | 1236.199 | 1239.581 | 1235.310 | 1237.832 | **1234.757** | 1239.502 |

AIC - Akaike information criterion, BIC—Bayesian information criterion, df—degrees of freedom, standard errors in parenthesis, e.env_approach—variance of the latent variable error, variable significant at level: ** – p<0.05, * – p<0.1, detailed description of the variables available in Table S1.; we present the best fitted model among the set of models describing the impact of: specialization (animal, mixed); farm size (es, production, ag_prod, uaa, lsu); land ownership (lease_p lease_b); pressure generated by production (stock_dens, fert_rate_A, fert_rate_B, fert_plan); subsidies (subs_A, subs_G, subs_B), education and experience (edu, ag_edu, edu_B, exper), profesionalisation (prof_A, no_contract, prof_B)

Source: own study based on the questionnaire survey.
